# Supplementary material for: Both Ligand- and Cell-Specific Parameters Control Ligand Agonism in a Kinetic Model of G Protein–Coupled Receptor Signaling
Source: PLOS journal article supplement (doi:10.1371/journal.pcbi.0030006), 2007-01-10

Both Ligand- and Cell-Specific Parameters Control Ligand Agonism in

a Kinetic Model of G protein Coupled Receptor Signaling

by

Tamara L. Kinzer-Ursem and Jennifer J. Linderman

**Supporting Text - Cubic Ternary Complex Activation Model (cTCAM)**

The reactions and the accompanying rate constants necessary to describe the cTCAM are shown in Fig. S1. Model detail and assumptions are explained in this supporting text. Differential equations describing the cTCAM were written according to mass action kinetics and are also outlined below (Eqns. S.19 – S.30).

*G-protein activation/inactivation steps*

Under physiological conditions, activation of G protein by an active receptor (R*) initiates a multi-step process of GDP dissociation, GTP association, and dissociation of the G protein heterotrimer into G and G subunits. These elementary processes are represented in the cTCAM (Fig. 1 and A1) as a single step with active receptor-G protein complexes (R*G and LR*G) activating G protein with the rate constant kGact in accordance with findings that show the dissociation of GDP from the G protein subunit to be the rate limiting step [1,2]. It is assumed that rate constant of G protein activation (kGact) is the same or similar for both constitutively active receptor/G-protein complexes (R*G) and ligand-associated active receptor/G protein complexes (LR*G). GαGTP is considered to be the response signal although it is known that Gβγ also couples to and activates signal transduction proteins [3,4]. The active GGTP subunit is deactivated when the nucleotide is hydrolyzed to form GGDP with a rate constant kGTP. This rate constant can vary over several 100 fold depending on the intrinsic GTPase activity of the G subunit or the presence of RGS proteins in the system [5,6]. Recombination of the GGDP and G subunits to form free G protein occurs with rate constant kG.

*Assumptions regarding rate constants describing ligand, receptor, and G-protein interactions*

When the system is at equilibrium (i.e. kGact=0) the principle of microscopic balance dictates that the forward and backward velocities of each elementary step must be equal [7,8]. This principle implies that the free energy change clockwise and counterclockwise around a path must be equal. For example, for the front face of the cube (Fig. S.1) the rate constants must be set so that k1k5k8k4=k3k7k6k2. Due to this thermodynamic constraint, only 19 of the 24 rate constants describing the ligand-receptor-G protein interactions are independent. Therefore, it is assumed that the ratio of the forward and backward rate constants in the model should reduce to the seven equilibrium constants of the cTCM ([9] and Fig. 1). These consist of three cellular dependent parameters (Kact, Kg, and ) that dictate receptor and G protein interaction in absence of ligand, three ligand dependent parameters (Ka, , and ), and one parameter () that is both ligand- and cell-specific. These relationships are

(S.1) k1/k2 = Kact

(S.2) k3/k4 = Ka

(S.3) k5/k6 = Ka

(S.4) k7/k8 = Kact

(S.5) k9/ k10 = Kg

(S.6) k11/k12 = Kg

(S.7) k13/k14 = Kact

(S.8) k15/k16 = Kg

(S.9) k17/k18 = Kg

(S.10) k19/k20 = Kact

(S.11) k21/k22 = Ka

(S.12) k23/k24 = Ka

By specifying these equilibrium parameters (7 in total), then, if the forward rate constant is known, the reverse rate constant can be calculated, leaving 12 parameters to specify. The three forward rate constants k1, k3, and k11 will be specified. Assumptions for the remaining 9 rate constants can be grouped into and are presented below in three categories. The independent ligand- and cell- specific parameters that make up the cTCAM are summarized in Table 1.

*Rate constants describing the reversible association of ligands and receptors*

It is assumed that G protein binding does not affect the ligand association rate constant such that the rate constants for L+RLR and L+RGLRG are equal (k3=k23), and L+R*LR*, L+R*GLR*G are equal (k5=k21). In at least one particular system it has been shown that the association rate constants for ligand binding to R and RG are the same [10]. Ligand association with the active receptor state R* is assumed to be influenced by the ligand-specific parameter  such that k5 = k3. Ligand-receptor dissociation rate constants are assumed not to be affected by receptor conformation such that the reactions LRR and LR*R* have equal rate constants (k4=k6). These assumptions are summarized in the following equations:

(S.13) k3 = k23

(S.14) k5 = k21 = k3

(S.15) k4 = k6

*Rate constants describing the reversible association of receptors and G proteins*

It is assumed that the inactive receptor conformation is unable to couple with full efficiency to G protein. The collision efficiency (), an adjustable parameter ranging 0 to 1, is used to implement this assumption [11] such that k9=k11. Ligand biases receptor conformation based on the parameter ; however it is assumed here that ligand does not have an effect on the association of either the active or inactive receptor conformation with G protein such that the rate constants for the reactions RRG and LRLRG are equal (k9=k15) and R*R*G and LR*LR*G are equal (k11=k17). Thus:

(S.16) k9 = k15 = k11

(S.17) k11 = k17

*Rate constants for the interconversion of receptor conformations*

The receptor inactivation is assumed not to be affected by ligand or G protein binding such that the rate constants describing the R*R, LR*LR, R*GRG, and LR*GLRG are equal. Thus:

(S.18) k2 = k8 = k14 = k20

*Model equations*

(S.19) dR[t]/dt = -k1R[t] + (k1/Kact)R*[t] - (k11)R[t]G[t] + ((k11)/Kg)RG[t] – k3R[t]L + (k3/Ka)*LR[t];

(S.20) dLR[t]/dt = -(k3/Ka)LR[t] + k3L*R[t] - αk1LR[t] + k1/KactLR*[t] – k11LR[t] G[t] + (k11/γKg)LRG[t]

(S.21) dRG[t]/dt = k11R[t]G[t] - (k11/Kg)RG[t] + (k3/γKa)LRG[t] - kfRG[t]L[t] - βk1RG[t] + (k1/Kact)RG[t]

(S.22) dLRG[t]/dt = k3RG[t]L - (k3/γKa)LRG[t] + ηk11LR[t]G[t] - (ηk11/γKg))LRG[t] + (k1/Kact)LR*G[t] - k1αβLRG[t]

(S.23) dR*[t]/dt = k1R[t] - (k1/Kact)R*[t] + (k3/Ka)LR*[t] - (αk3)R*[t]L - βk11R*[t]
G[t] + (k11/Kg)R*G[t] + kGactR*G[t]

(S.24) dLR*[t]/dt = αk1LR[t] - (k1/Kact)LR*[t] - (k3/Ka)LR*[t] + αk3R*[t]L - βk11LR*[t]G[t] + (k11/γKg)LR*G[t] + kGactLR*G[t]

(S.25) dR*G[t]/dt = βk11G[t]R*[t] - (k11/Kg)R*G[t] + βk1RG[t] - (k1/Kact)R*G[t] -αk3R*G[t]L + (k3/γKa)LR*G[t] - kGactR*G[t]

(S.26) dLR*G[t]/dt = αk3R*G[t]L - (k3/γKa)LR*G[t] + βk11LR*[t]G[t] - (k11/γKg)LR*G[t] + αβk1LRG[t] - (k1/Kact)LR*G[t] - kGactLR*G[t]

(S.27) dGαGTP[t]/dt = kGact(R*G[t] + LR*G[t]) - kGTP GαGTP[t]

(S.28) dGαGDP[t]/dt = kGTP GαGTP[t] - kG GαGDP[t]Gβγ[t]

(S.29) dGβγ[t]/dt = kGact(R*G[t] + LR*G[t]) - kG GαGDP[t]Gβγ[t]

(S.30) dG[t]/dt = -ηk11R[t]G[t] + (ηk11/Kg)RG[t] - ηk11LR[t]G[t] + (ηk11/γKg)LRG[t] - βk11LR*[t]G[t] + (k11/γKg)LR*G[t] - βk11G[t]R*[t] + (k11/Kg)R*G[t] + kGGαGDP[t]Gβγ[t]

Equations were solved numerically using the NDSolve function in Mathematica® (Wolfram Research Inc., Champaign, IL). Total receptor and G protein (Rtotal and Gtotal) were set as the initial values of R and G while all other species were set to zero. The system was allowed to come to steady state (typically less that 100 seconds) at which point ligand (L) was added (denoted as time = 0) and each species tracked over time.

**References**

1. Remmers AE, Engel C, Liu M, Neubig RR (1999) Interdomain interactions regulate GDP release from heterotrimeric G proteins. Biochemistry 38: 13795-13800.

2. Traynor JR, Clark MJ, Remmers AE (2002) Relationship between rate and extent of G protein activation: Comparison between full and partial opioid agonists. J Pharmacol Exp Ther 300: 157-161.

3. Robishaw JD, Berlot CH (2004) Translating G protein subunit diversity into functional specificity. Curr Opin Cell Biol 16: 206-209.

4. Cabrera-Vera TM, Vanhauwe J, Thomas TO, Medkova M, Preininger A, et al. (2003) Insights into G protein structure, function, and regulation. Endocr Rev 24: 765-781.

5. Lan KL, Zhong H, Nanamori M, Neubig RR (2000) Rapid kinetics of regulator of G-protein signaling (RGS)-mediated Galphai and Galphao deactivation. Galpha specificity of RGS4 and RGS7. J Biol Chem 275: 33497-33503.

6. Zhong H, Wade SM, Woolf PJ, Linderman JJ, Traynor JR, et al. (2002) A spatial focusing model for G protein signals: RGS protein-mediated kinetic scaffolding. J Biol Chem 278: 7278-7284.

7. Wyman J (1975) The turning wheel: A study in steady states. Proc Natl Acad Sci U S A 72: 3983-3987.

8. Lauffenburger DA, Linderman JJ (1993) Receptors: Models for binding, trafficking, and signaling. New York: Oxford University Press. 365 p.

9. Shea LD, Neubig RR, Linderman JJ (2000) Timing is everything - the role of kinetics in G protein activation. Life Sci 68: 647-658.

10. Posner RG, Fay SP, Domalewski MD, Sklar LA (1994) Continuous spectrofluorometric analysis of formyl peptide receptor ternary complex interactions. Mol Pharmacol 45: 65-73.

11. Shea LD, Omann GM, Linderman JJ (1997) Calculation of diffusion-limited kinetics for the reactions in collision coupling and receptor cross-linking. Biophys J 73: 2949-2959.

**Figure Legend**

**Figure S.1. The cubic ternary complex activation model (cTCAM).** The numbered (k1-k24) rate constants describe the forward and reverse reactions for ligand, receptor and G protein interactions, and the lettered rate constants (kGact, kGTP, and kG) describe G protein activation and recycling [9].

**Figure S.1**


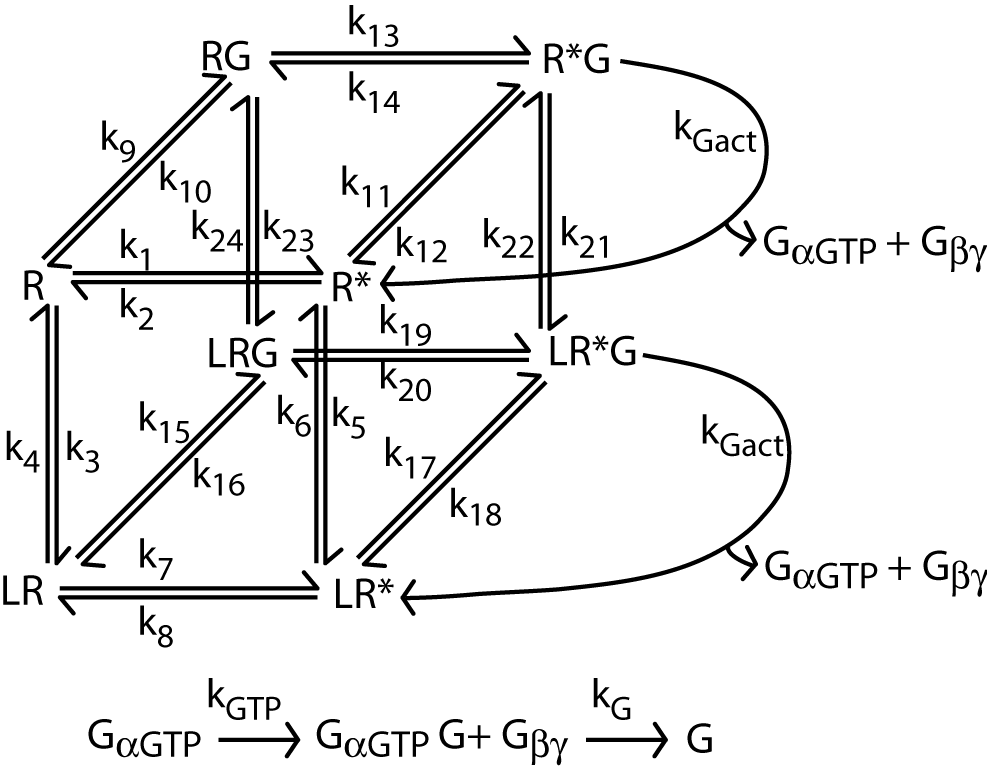

Supplement: S1 (10.1371/journal.pcbi.0030006.s001) [file journal.pcbi.0030006.s001]
